# Supplementary material for: Roadside verges can support spontaneous establishment of steppe-like habitats hosting diverse assemblages of bees and wasps (Hymenoptera: Aculeata) in an intensively cultivated central European landscape
Source: Springer Nature journal article supplement (doi:10.1007/s10531-016-1275-7), 2016-12-10
Supplement: MOESM3 [file 11917004]

| Sampling site | Altitude [m a.s.l.] | Slope orientation | Slope [°] | Soil penetration resistance [kg*cm-2] | Soil shear strength resistance [kg*cm-2] | Soil texture [% of total] | | | | |
| --- | --- | --- | --- | --- | --- | --- | --- | --- | --- | --- |
|  |  |  |  |  |  | >4 mm | 2-4 mm | 0.125-2 mm | 0.072-0.125 mm | <0.072 mm |
| Postoloprty – Březno | 198 | SSE | 30.5 | 0.70 | 0.400 | 0.00 | 1.11 | 95.87 | 2.20 | 0.82 |
| Louny – Jimlínská | 239 | SSW | 34.0 | 0.60 | 0.250 | 6.58 | 12.98 | 78.39 | 1.01 | 1.04 |
| Louny – Průmyslová | 235 | SSW | 37.0 | 1.00 | 0.425 | 49.61 | 3.51 | 41.29 | 2.74 | 2.84 |
| Panenský Týnec | 359 | SSW | 23.0 | 1.25 | 0.300 | 77.31 | 12.25 | 9.49 | 0.53 | 0.43 |
| Žerotín | 302 | SSW | 17.5 | 1.10 | 0.400 | 4.95 | 16.34 | 76.20 | 1.37 | 1.13 |
| Třebíz | 306 | WSW | 27.0 | >4.5 | 0.900 | 24.04 | 2.71 | 64.86 | 2.95 | 5.45 |
| Slaný | 304 | S | 35.0 | 0.08 | 0.010 | 0.22 | 2.31 | 94.57 | 2.29 | 0.61 |
| Studeněves | 283 | S | 16.5 | 1.10 | 0.125 | 22.97 | 22.13 | 53.92 | 0.58 | 0.41 |
| Kvíc | 300 | WSW | 23.0 | 0.60 | 0.350 | 2.37 | 4.59 | 90.68 | 1.37 | 0.99 |
| Netovice – west | 330 | S | 34.0 | >4.5 | 1.300 | 0.00 | 0.00 | 97.55 | 1.67 | 0.78 |
| Netovice – south | 313 | SSE | 35.0 | 4.30 | 0.975 | 0.00 | 0.00 | 95.67 | 2.52 | 1.81 |
| Netovice – east | 292 | SSW | 25.0 | 1.00 | 0.350 | 63.33 | 16.23 | 18.16 | 0.79 | 1.49 |
| Knovíz | 325 | SW | 18.5 | 0.55 | 0.450 | 48.55 | 16.95 | 34.01 | 0.34 | 0.14 |
| Třebusice | 318 | SSW | 27.5 | 0.13 | 0.038 | 37.07 | 18.27 | 44.50 | 0.12 | 0.05 |
